# Supplementary material for: HCV Eradication with Direct-Acting Antivirals Does Not Impact HCC Progression on the Waiting List or HCC Recurrence after Liver Transplantation
Source: Hindawi journal article supplement (doi:10.1155/2019/2509059), 2019-01-17
Supplement: f1 [file 2509059.f1.pdf]

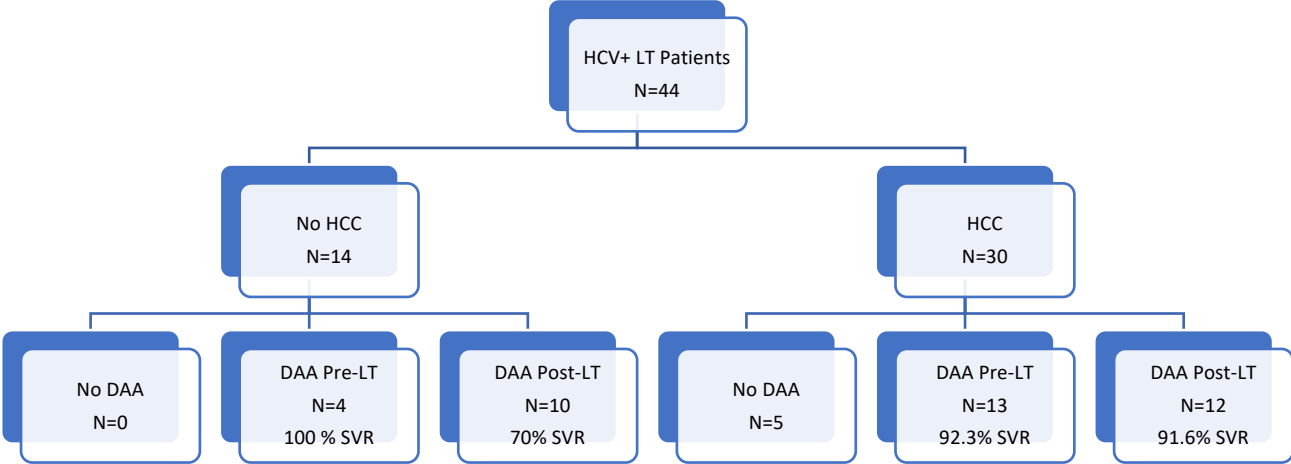

**Supplemental Figure 1: Schematic outline of HCV+ LT patients included in the study.**

## Supplemental Table 1: HCV Treatment Regimens

| Genotype, N (%)       | DAA Pre-Transplant (N=17) | DAA Post-Transplant (N=23) | Patients without SVR Post-Transplant (N=8)                                                                                            |
|-----------------------|---------------------------|----------------------------|---------------------------------------------------------------------------------------------------------------------------------------|
| 1                     |                           |                            |                                                                                                                                       |
| Sofosbuvir/Ledipasvir | 12 (70.6)                 | 14 (60.9)**                | 4<br>1-failed Sofosbuvir/Ledipasvir<br>1-death on treatment with FCH<br>1-death on treatment with ductopenic rejection<br>1-untreated |
| Sofosbuvir/Ribavirin  | 1 (5.9)*                  | 3 (13.0)                   |                                                                                                                                       |
| Sofosbuvir/Simeprevir | 1 (5.9)                   | 2 (8.7)                    |                                                                                                                                       |
| 2                     |                           |                            |                                                                                                                                       |
| Sofosbuvir/Ribavirin  | 1 (5.9)                   | 0                          | 0                                                                                                                                     |
| Sofosbuvir/Ledipasvir | 0                         | 1 (4.3)                    |                                                                                                                                       |
| 3                     |                           |                            |                                                                                                                                       |
| Sofosbuvir/Ribavirin  | 1 (5.9)                   | 0                          | 4<br>3-untreated<br>1-death with FCH                                                                                                  |
| Sofosbuvir/Ledipasvir | 0                         | 1 (4.3)                    |                                                                                                                                       |
| Study Protocol        | 0                         | 1 (4.3)***                 |                                                                                                                                       |
| 4                     |                           |                            |                                                                                                                                       |
| Sofosbuvir            | 1 (5.9)                   | 0                          | 0                                                                                                                                     |

\*N=1 Failed to achieve SVR; \*\*N=2 Failed to achieve SVR; \*\*\*Presently on treatment.  
FCH (Fibrosing Cholestatic Hepatitis)
